# Supplementary material for: Differentiating between cancer and normal tissue samples using multi-hit combinations of genetic mutations
Source: PubMed Central journal article supplement (PMC6353925; doi:10.1038/s41598-018-37835-6), 2019-01-30
Supplement: 41598_2018_37835_MOESM1_ESM.pdf [file 41598_2018_37835_MOESM1_ESM.pdf]

# Differentiating between cancer and normal tissue samples using multi-hit combinations of genetic mutations

(Supplementary Material)

Sajal Dash, Nicholas Kinney, Robin Varghese, Harold Garner, Wu-chun Feng, and  
Ramu Anandakrishnan

November 27, 2018

## A Supplementary Material

### A.1 Identifying somatic variants using MuTect2 and VEP: command parameters

Preliminary step of our approach is to identify meaningful somatic variations. We identify somatic variations by comparing tumor and normal tissue samples with blood-derived normal samples using MuTect2.

We use the following command for germline variant calling.

```
java -jar GenomeAnalysisTK.jar
  -T MuTect2 -R GRCh38.d1.vd1.fa
  -I:tumor tissue.bam -I:normal blood-normal.bam -o output.vcf
  --disable_auto_index_creation_and_locking_when_reading_rods
  --max_alt_alleles_in_normal_count 2
  --contamination_fraction_to_filter 0.02 --dbsnp dbsnp.vcf
  --cosmic cosmic.vcf 279
```

Once the variants are identified, we compute the effect of these variants using Variant Effect Predictor(VEP). We used the following VEP command for effect prediction:

```
perl variant_effect_predictor.pl
    -i input.vcf -o output.vep --fasta GRCh38-directory --nostats
```

## A.2 Algorithm and Data Structure

**Input and Data Structure** We first prepare the following data structures from the tumor tissue samples and normal tissue samples.

| Data                        | Description                                                                                                                                       |
|-----------------------------|---------------------------------------------------------------------------------------------------------------------------------------------------|
| $G_{selected}$              | a list of selected genes. <i>List</i> $\langle Gene \rangle$ .                                                                                    |
| <i>TumorCoverage</i>        | a dictionary object mapping any gene to a set of tumor samples it covers. <i>Dict</i> $\langle Gene, Set \langle TumorSample \rangle \rangle$ .   |
| <i>NormalCoverage</i>       | a dictionary object mapping any gene to a set of normal samples it covers. <i>Dict</i> $\langle Gene, Set \langle NormalSample \rangle \rangle$ . |
| <i>TumorSamples</i>         | a set of all tumor tissue samples. <i>Set</i> $\langle TumorSamples \rangle$                                                                      |
| <i>NormalSamples</i>        | a set of all normal tissue samples. <i>Set</i> $\langle NormalSamples \rangle$                                                                    |
| <i>CandidateCombination</i> | $G_{selected} \times G_{selected}$ , a set of all candidate Combinations.                                                                         |

## A.3 Robustness of our algorithm across sets of partitions

We partitioned the data in three different ways, and the average classification performance in each case is comparable. Table S1 shows the result when we run our algorithm on the second partition.

## A.4 Identified Combinations for 17 Cancer Types

Table S2-S18 show identified 2-hit combinations for 17 cancer types using the first partition.

---

**Algorithm 1** Identifying 2-hit combinations

---

**Require:**  $G_{selected}$ ,  $TumorCoverage$ ,  $NormalCoverage$ ,  $TumorSamples$ ,  $NormalSamples$ ,  $CandidateCombinations$

- 1: Initialize  $C \leftarrow \phi$
- 2:  $CoveredTumorSamples \leftarrow \phi$
- 3:  $CoveredNormalSamples \leftarrow \phi$
- 4:  $\mathbb{C}$
- 5: **while**  $|coveredTumorSamples| \neq |TumorSamples|$  **do**
- 6:    $weights \leftarrow \phi$
- 7:   **for**  $combination \in CandidateCombinations$  **do**
- 8:      $g_1, g_2 \leftarrow extract(combination)$
- 9:      $Cov_T(g_1) \leftarrow TumorCoverage.getSamples(g_1)$
- 10:      $Cov_T(g_2) \leftarrow TumorCoverage.getSamples(g_2)$
- 11:      $Cov_T(combination) \leftarrow Cov_T(g_1) \cap Cov_T(g_2) - CoveredTumorSamples$
- 12:
- 13:      $Cov_N(g_1) \leftarrow NormalCoverage.getSamples(g_1)$
- 14:      $Cov_N(g_2) \leftarrow NormalCoverage.getSamples(g_2)$
- 15:      $Cov_N(combination) \leftarrow Cov_N(g_1) \cap Cov_N(g_2) - CoveredNormalSamples$
- 16:      $weight(combination) \leftarrow f(Cov_N(combination), Cov_T(combination))$
- 17:      $weights[combination] \leftarrow weight(combination)$
- 18:   **end for**
- 19:
- 20:    $bestCombination \leftarrow argmin\{weights\}$
- 21:   Update  $CoveredTumorSamples$  and  $CoveredNormalSamples$  using  $bestCombination$
- 22:    $\mathbb{C} \leftarrow \mathbb{C} \cup \{bestCombination\}$
- 23:    $CandidateCombinations \leftarrow CandidateCombinations - bestCombination$
- 24: **end while**
- 25:
- 26: **return**  $\mathbb{C}$

---

| Cancer Type | #Hits | #Combinations | Discovery Set  |                 |       |             |                |                 |       | Validation Set |                |                 |       |                |                         |                |                 |       |             |                         |
|-------------|-------|---------------|----------------|-----------------|-------|-------------|----------------|-----------------|-------|----------------|----------------|-----------------|-------|----------------|-------------------------|----------------|-----------------|-------|-------------|-------------------------|
|             |       |               | Tumor Samples  |                 |       |             | Normal Samples |                 |       | Tumor Samples  |                |                 |       | Normal Samples |                         |                |                 |       |             |                         |
|             |       |               | True Positives | False Negatives | Total | Sensitivity | True Negatives | False Positives | Total | Specificity    | True Positives | False Negatives | Total | Sensitivity    | 95% Confidence Interval | True Negatives | False Positives | Total | Specificity | 95% Confidence Interval |
| BLCA        | 2     | 17            | 283            | 0               | 283   | 1.00        | 239            | 1               | 240   | 1.00           | 78             | 7               | 85    | 0.92           | 83-96%                  | 78             | 15              | 93    | 0.84        | 74-90%                  |
| BRCA        | 2     | 7             | 674            | 0               | 674   | 1.00        | 234            | 6               | 240   | 0.97           | 235            | 2               | 237   | 0.99           | 96-99%                  | 82             | 11              | 93    | 0.88        | 79-93%                  |
| CESC        | 2     | 9             | 209            | 0               | 209   | 1.00        | 240            | 0               | 240   | 1.00           | 57             | 8               | 65    | 0.88           | 77-94%                  | 82             | 11              | 93    | 0.88        | 79-93%                  |
| COAD        | 2     | 10            | 287            | 0               | 287   | 1.00        | 239            | 1               | 240   | 1.00           | 93             | 5               | 98    | 0.95           | 88-98%                  | 89             | 4               | 93    | 0.96        | 89-98%                  |
| GBM         | 2     | 10            | 252            | 0               | 252   | 1.00        | 240            | 0               | 240   | 1.00           | 71             | 8               | 79    | 0.90           | 81-95%                  | 88             | 5               | 93    | 0.95        | 87-98%                  |
| HNSC        | 2     | 12            | 360            | 0               | 360   | 1.00        | 238            | 2               | 240   | 0.99           | 101            | 9               | 110   | 0.92           | 85-96%                  | 87             | 6               | 93    | 0.94        | 86-97%                  |
| KIRP        | 2     | 10            | 181            | 0               | 181   | 1.00        | 239            | 1               | 240   | 1.00           | 44             | 3               | 47    | 0.94           | 82-98%                  | 84             | 9               | 93    | 0.90        | 82-95%                  |
| LGG         | 2     | 11            | 360            | 0               | 360   | 1.00        | 236            | 4               | 240   | 0.98           | 112            | 7               | 119   | 0.94           | 88-97%                  | 85             | 8               | 93    | 0.91        | 83-96%                  |
| LHIC        | 2     | 8             | 223            | 0               | 223   | 1.00        | 239            | 1               | 240   | 1.00           | 83             | 6               | 89    | 0.93           | 85-97%                  | 85             | 8               | 93    | 0.91        | 83-96%                  |
| LUAD        | 2     | 12            | 310            | 0               | 310   | 1.00        | 239            | 1               | 240   | 1.00           | 93             | 6               | 99    | 0.94           | 87-97%                  | 85             | 8               | 93    | 0.91        | 83-96%                  |
| LUSC        | 2     | 11            | 228            | 0               | 228   | 1.00        | 239            | 1               | 240   | 1.00           | 65             | 12              | 77    | 0.84           | 74-91%                  | 89             | 4               | 93    | 0.96        | 89-98%                  |
| OV          | 2     | 9             | 231            | 0               | 231   | 1.00        | 240            | 0               | 240   | 1.00           | 83             | 3               | 86    | 0.97           | 90-99%                  | 90             | 3               | 93    | 0.97        | 90-99%                  |
| PRAD        | 2     | 21            | 321            | 0               | 321   | 1.00        | 239            | 1               | 240   | 1.00           | 87             | 13              | 100   | 0.87           | 78-92%                  | 72             | 21              | 93    | 0.77        | 67-85%                  |
| SARC        | 2     | 5             | 151            | 0               | 151   | 1.00        | 240            | 0               | 240   | 1.00           | 66             | 2               | 68    | 0.97           | 89-99%                  | 93             | 0               | 93    | 1.00        | 96-100%                 |
| STAD        | 2     | 17            | 297            | 0               | 297   | 1.00        | 239            | 1               | 240   | 1.00           | 84             | 7               | 91    | 0.92           | 84-96%                  | 77             | 16              | 93    | 0.83        | 73-89%                  |
| THCA        | 2     | 16            | 323            | 0               | 323   | 1.00        | 239            | 1               | 240   | 1.00           | 92             | 6               | 98    | 0.94           | 87-97%                  | 83             | 10              | 93    | 0.89        | 81-94%                  |
| UCEC        | 2     | 6             | 360            | 0               | 360   | 1.00        | 234            | 6               | 240   | 0.97           | 135            | 0               | 135   | 1.00           | 97-100%                 | 87             | 6               | 93    | 0.94        | 86-97%                  |
| Total       | 2     | 191           | 5050           | 0               | 5050  | 1.00        | 4053           | 27              | 4080  | 0.99           | 1579           | 104             | 1683  | 0.94           | 92-94%                  | 1436           | 145             | 1581  | 0.91        | 89-92%                  |

Table S1: Result for 2-hit combinations

| Combination | Gene1           | Gene2           | #Samples Covered | Fraction Coverage |
|-------------|-----------------|-----------------|------------------|-------------------|
| 1           | ENSG00000205277 | ENSG00000184956 | 781              | 0.857299670692    |
| 2           | ENSG00000149531 | ENSG00000211896 | 347              | 0.380900109769    |
| 3           | ENSG00000219481 | ENSG00000173213 | 305              | 0.334796926454    |
| 4           | ENSG00000185567 | ENSG00000090512 | 81               | 0.0889132821076   |
| 5           | ENSG00000170471 | ENSG00000205869 | 79               | 0.0867178924259   |
| 6           | ENSG00000178104 | ENSG00000275113 | 47               | 0.0515916575192   |
| 7           | ENSG00000149531 | ENSG00000084731 | 29               | 0.0318331503842   |
| 8           | ENSG00000137210 | ENSG00000198888 | 8                | 0.00878155872667  |

Table S2: Sample coverage by combinations for BRCA

| Combination | Gene1           | Gene2           | #Samples Covered | Fraction Coverage |
|-------------|-----------------|-----------------|------------------|-------------------|
| 1           | ENSG00000172199 | ENSG00000173213 | 214              | 0.646525679758    |
| 2           | ENSG00000149531 | ENSG00000211896 | 116              | 0.350453172205    |
| 3           | ENSG00000149531 | ENSG00000161905 | 109              | 0.329305135952    |
| 4           | ENSG00000127481 | ENSG00000158445 | 103              | 0.311178247734    |
| 5           | ENSG00000237541 | ENSG00000171862 | 91               | 0.274924471299    |
| 6           | ENSG00000177731 | ENSG00000124092 | 88               | 0.26586102719     |
| 7           | ENSG00000198601 | ENSG00000100151 | 41               | 0.123867069486    |
| 8           | ENSG00000149531 | ENSG00000050438 | 41               | 0.123867069486    |
| 9           | ENSG00000125498 | ENSG00000166272 | 18               | 0.0543806646526   |
| 10          | ENSG00000241322 | ENSG00000176302 | 6                | 0.0181268882175   |

Table S3: Sample coverage by combinations for GBM

| Combination | Gene1           | Gene2           | #Samples Covered | Fraction Coverage |
|-------------|-----------------|-----------------|------------------|-------------------|
| 1           | ENSG00000205277 | ENSG00000149531 | 334              | 0.674747474747    |
| 2           | ENSG00000184956 | ENSG00000173213 | 282              | 0.569696969697    |
| 3           | ENSG00000196126 | ENSG00000171862 | 224              | 0.452525252525    |
| 4           | ENSG00000205277 | ENSG00000278662 | 188              | 0.379797979798    |
| 5           | ENSG00000171862 | ENSG00000211896 | 172              | 0.347474747475    |
| 6           | ENSG00000141510 | ENSG00000174501 | 159              | 0.321212121212    |
| 7           | ENSG00000079841 | ENSG00000205277 | 79               | 0.159595959596    |
| 8           | ENSG00000198128 | ENSG00000102890 | 22               | 0.0444444444444   |
| 9           | ENSG00000197887 | ENSG00000161031 | 19               | 0.0383838383838   |
| 10          | ENSG00000243073 | ENSG00000196460 | 10               | 0.020202020202    |

Table S4: Sample coverage by combinations for UCEC

| Combination | Gene1           | Gene2           | #Samples Covered | Fraction Coverage |
|-------------|-----------------|-----------------|------------------|-------------------|
| 1           | ENSG00000184956 | ENSG00000173213 | 192              | 0.521739130435    |
| 2           | ENSG00000169862 | ENSG00000149531 | 175              | 0.475543478261    |
| 3           | ENSG00000186409 | ENSG00000139687 | 35               | 0.0951086956522   |
| 4           | ENSG00000213928 | ENSG00000163435 | 24               | 0.0652173913043   |
| 5           | ENSG00000204479 | ENSG00000124762 | 24               | 0.0652173913043   |
| 6           | ENSG00000169862 | ENSG00000119720 | 24               | 0.0652173913043   |
| 7           | ENSG00000141510 | ENSG00000171502 | 23               | 0.0625            |
| 8           | ENSG00000109758 | ENSG00000171936 | 21               | 0.0570652173913   |
| 9           | ENSG00000099917 | ENSG00000116044 | 16               | 0.0434782608696   |
| 10          | ENSG00000147050 | ENSG00000108840 | 15               | 0.0407608695652   |
| 11          | ENSG00000240864 | ENSG00000196498 | 13               | 0.0353260869565   |
| 12          | ENSG00000171680 | ENSG00000071626 | 11               | 0.0298913043478   |
| 13          | ENSG00000153933 | ENSG00000244482 | 11               | 0.0298913043478   |
| 14          | ENSG00000158290 | ENSG00000089041 | 9                | 0.0244565217391   |
| 15          | ENSG00000156650 | ENSG00000139910 | 9                | 0.0244565217391   |
| 16          | ENSG00000163959 | ENSG00000153815 | 6                | 0.0163043478261   |
| 17          | ENSG00000205356 | ENSG00000125810 | 5                | 0.0135869565217   |
| 18          | ENSG00000126262 | ENSG00000166736 | 5                | 0.0135869565217   |

Table S5: Sample coverage by combinations for BLCA

| Combination | Gene1           | Gene2           | #Samples Covered | Fraction Coverage |
|-------------|-----------------|-----------------|------------------|-------------------|
| 1           | ENSG00000184956 | ENSG00000173213 | 129              | 0.565789473684    |
| 2           | ENSG00000134775 | ENSG00000149531 | 112              | 0.491228070175    |
| 3           | ENSG00000197915 | ENSG00000227152 | 68               | 0.298245614035    |
| 4           | ENSG00000149531 | ENSG00000204525 | 66               | 0.289473684211    |
| 5           | ENSG00000169174 | ENSG00000145920 | 37               | 0.162280701754    |
| 6           | ENSG00000197915 | ENSG00000204661 | 26               | 0.114035087719    |
| 7           | ENSG00000213516 | ENSG00000175193 | 5                | 0.0219298245614   |
| 8           | ENSG00000159409 | ENSG00000137337 | 4                | 0.0175438596491   |
| 9           | ENSG00000142798 | ENSG00000180767 | 4                | 0.0175438596491   |
| 10          | ENSG00000070413 | ENSG00000140795 | 4                | 0.0175438596491   |
| 11          | ENSG00000004866 | ENSG00000178188 | 3                | 0.0131578947368   |

Table S6: Sample coverage by combinations for KIRP

| Combination | Gene1           | Gene2           | #Samples Covered | Fraction Coverage |
|-------------|-----------------|-----------------|------------------|-------------------|
| 1           | ENSG00000184956 | ENSG00000173213 | 176              | 0.577049180328    |
| 2           | ENSG00000141510 | ENSG00000149531 | 145              | 0.475409836066    |
| 3           | ENSG00000141510 | ENSG00000130226 | 37               | 0.12131147541     |
| 4           | ENSG00000141510 | ENSG00000221900 | 32               | 0.104918032787    |
| 5           | ENSG00000141510 | ENSG00000170959 | 31               | 0.101639344262    |
| 6           | ENSG00000155657 | ENSG00000205246 | 29               | 0.0950819672131   |
| 7           | ENSG00000133863 | ENSG00000141510 | 29               | 0.0950819672131   |
| 8           | ENSG00000187537 | ENSG00000179603 | 11               | 0.0360655737705   |
| 9           | ENSG00000127507 | ENSG00000121898 | 8                | 0.0262295081967   |
| 10          | ENSG00000170382 | ENSG00000173531 | 7                | 0.0229508196721   |
| 11          | ENSG00000143882 | ENSG00000167822 | 5                | 0.016393442623    |
| 12          | ENSG00000007923 | ENSG00000197841 | 3                | 0.00983606557377  |

Table S7: Sample coverage by combinations for LUSC

| Combination | Gene1           | Gene2           | #Samples Covered | Fraction Coverage |
|-------------|-----------------|-----------------|------------------|-------------------|
| 1           | ENSG00000205277 | ENSG00000149531 | 153              | 0.698630136986    |
| 2           | ENSG00000184956 | ENSG00000173213 | 137              | 0.625570776256    |
| 3           | ENSG00000205277 | ENSG00000197978 | 87               | 0.397260273973    |
| 4           | ENSG00000145506 | ENSG00000205277 | 68               | 0.310502283105    |
| 5           | ENSG00000169047 | ENSG00000273976 | 26               | 0.118721461187    |
| 6           | ENSG00000173662 | ENSG00000006377 | 11               | 0.0502283105023   |

Table S8: Sample coverage by combinations for SARC

| Combination | Gene1           | Gene2           | #Samples Covered | Fraction Coverage |
|-------------|-----------------|-----------------|------------------|-------------------|
| 1           | ENSG00000184956 | ENSG00000173213 | 188              | 0.686131386861    |
| 2           | ENSG00000205277 | ENSG00000149531 | 168              | 0.613138686131    |
| 3           | ENSG00000205277 | ENSG00000278662 | 128              | 0.467153284672    |
| 4           | ENSG00000204525 | ENSG00000149531 | 77               | 0.28102189781     |
| 5           | ENSG00000205277 | ENSG00000157423 | 62               | 0.226277372263    |
| 6           | ENSG00000197915 | ENSG00000227152 | 46               | 0.167883211679    |
| 7           | ENSG00000279804 | ENSG00000131951 | 12               | 0.043795620438    |
| 8           | ENSG00000004455 | ENSG00000178199 | 7                | 0.0255474452555   |
| 9           | ENSG00000237541 | ENSG00000153391 | 6                | 0.021897810219    |

Table S9: Sample coverage by combinations for CESC

| Combination | Gene1           | Gene2           | #Samples Covered | Fraction Coverage |
|-------------|-----------------|-----------------|------------------|-------------------|
| 1           | ENSG00000149531 | ENSG00000134775 | 197              | 0.63141025641     |
| 2           | ENSG00000227152 | ENSG00000184956 | 137              | 0.439102564103    |
| 3           | ENSG00000186844 | ENSG00000134775 | 125              | 0.400641025641    |
| 4           | ENSG00000177212 | ENSG00000173213 | 120              | 0.384615384615    |
| 5           | ENSG00000149531 | ENSG00000188162 | 92               | 0.294871794872    |
| 6           | ENSG00000147234 | ENSG00000145920 | 77               | 0.246794871795    |
| 7           | ENSG00000141510 | ENSG00000130558 | 34               | 0.108974358974    |
| 8           | ENSG00000198128 | ENSG00000171368 | 13               | 0.0416666666667   |
| 9           | ENSG00000171680 | ENSG00000204310 | 5                | 0.0160256410256   |

Table S10: Sample coverage by combinations for LIHC

| Combination | Gene1           | Gene2           | #Samples Covered | Fraction Coverage |
|-------------|-----------------|-----------------|------------------|-------------------|
| 1           | ENSG00000184956 | ENSG00000173213 | 252              | 0.616136919315    |
| 2           | ENSG00000169862 | ENSG00000149531 | 205              | 0.501222493888    |
| 3           | ENSG00000198216 | ENSG00000133703 | 81               | 0.19804400978     |
| 4           | ENSG00000227152 | ENSG00000010438 | 70               | 0.171149144254    |
| 5           | ENSG00000116147 | ENSG00000141510 | 63               | 0.154034229829    |
| 6           | ENSG00000172765 | ENSG00000118046 | 36               | 0.0880195599022   |
| 7           | ENSG00000187741 | ENSG00000081842 | 21               | 0.0513447432763   |
| 8           | ENSG00000146648 | ENSG00000140323 | 17               | 0.041564792176    |
| 9           | ENSG00000204479 | ENSG00000179593 | 16               | 0.039119804401    |
| 10          | ENSG00000181396 | ENSG00000156650 | 15               | 0.0366748166259   |
| 11          | ENSG00000171680 | ENSG00000185640 | 10               | 0.0244498777506   |
| 12          | ENSG00000184677 | ENSG00000165370 | 9                | 0.0220048899756   |
| 13          | ENSG00000146830 | ENSG00000272514 | 7                | 0.0171149144254   |

Table S11: Sample coverage by combinations for LUAD

| Combination | Gene1           | Gene2           | #Samples Covered | Fraction Coverage |
|-------------|-----------------|-----------------|------------------|-------------------|
| 1           | ENSG00000138413 | ENSG00000184956 | 375              | 0.782881002088    |
| 2           | ENSG00000184956 | ENSG00000173213 | 294              | 0.613778705637    |
| 3           | ENSG00000149531 | ENSG00000158865 | 115              | 0.240083507307    |
| 4           | ENSG00000179912 | ENSG00000149531 | 101              | 0.210855949896    |
| 5           | ENSG00000173826 | ENSG00000177468 | 7                | 0.0146137787056   |
| 6           | ENSG00000167395 | ENSG00000144791 | 6                | 0.0125260960334   |
| 7           | ENSG00000130244 | ENSG00000112984 | 6                | 0.0125260960334   |
| 8           | ENSG00000144381 | ENSG00000204516 | 5                | 0.0104384133612   |
| 9           | ENSG00000134184 | ENSG00000122257 | 5                | 0.0104384133612   |

Table S12: Sample coverage by combinations for LGG

| Combination | Gene1           | Gene2           | #Samples Covered | Fraction Coverage |
|-------------|-----------------|-----------------|------------------|-------------------|
| 1           | ENSG00000184956 | ENSG00000173213 | 308              | 0.655319148936    |
| 2           | ENSG00000141510 | ENSG00000211896 | 195              | 0.414893617021    |
| 3           | ENSG00000149531 | ENSG00000204525 | 92               | 0.195744680851    |
| 4           | ENSG00000214324 | ENSG00000055609 | 83               | 0.176595744681    |
| 5           | ENSG00000146555 | ENSG00000149531 | 64               | 0.136170212766    |
| 6           | ENSG00000276644 | ENSG00000141510 | 21               | 0.0446808510638   |
| 7           | ENSG00000154222 | ENSG00000099957 | 18               | 0.0382978723404   |
| 8           | ENSG00000204442 | ENSG00000063169 | 16               | 0.0340425531915   |
| 9           | ENSG00000065526 | ENSG00000021645 | 15               | 0.031914893617    |
| 10          | ENSG00000146112 | ENSG00000166343 | 12               | 0.0255319148936   |
| 11          | ENSG00000197429 | ENSG00000154175 | 11               | 0.0234042553191   |
| 12          | ENSG00000198793 | ENSG00000179588 | 4                | 0.00851063829787  |
| 13          | ENSG00000117148 | ENSG00000211967 | 4                | 0.00851063829787  |

Table S13: Sample coverage by combinations for HNSC

| Combination | Gene1           | Gene2           | #Samples Covered | Fraction Coverage |
|-------------|-----------------|-----------------|------------------|-------------------|
| 1           | ENSG00000184956 | ENSG00000173213 | 221              | 0.569587628866    |
| 2           | ENSG00000149531 | ENSG00000204525 | 89               | 0.229381443299    |
| 3           | ENSG00000163283 | ENSG00000149531 | 84               | 0.216494845361    |
| 4           | ENSG00000141510 | ENSG00000177548 | 39               | 0.100515463918    |
| 5           | ENSG00000110046 | ENSG00000171936 | 39               | 0.100515463918    |
| 6           | ENSG00000162927 | ENSG00000141510 | 36               | 0.0927835051546   |
| 7           | ENSG00000116251 | ENSG00000198216 | 36               | 0.0927835051546   |
| 8           | ENSG00000163629 | ENSG00000141510 | 32               | 0.0824742268041   |
| 9           | ENSG00000234745 | ENSG00000039068 | 29               | 0.0747422680412   |
| 10          | ENSG00000116251 | ENSG00000198929 | 24               | 0.0618556701031   |
| 11          | ENSG00000168702 | ENSG00000120963 | 20               | 0.0515463917526   |
| 12          | ENSG00000159650 | ENSG00000211896 | 15               | 0.0386597938144   |
| 13          | ENSG00000153201 | ENSG00000100151 | 14               | 0.0360824742268   |
| 14          | ENSG00000196126 | ENSG00000158488 | 12               | 0.0309278350515   |
| 15          | ENSG00000124466 | ENSG00000185177 | 11               | 0.0283505154639   |
| 16          | ENSG00000167548 | ENSG00000131203 | 8                | 0.020618556701    |
| 17          | ENSG00000211721 | ENSG00000203933 | 7                | 0.0180412371134   |
| 18          | ENSG00000184677 | ENSG00000184814 | 3                | 0.00773195876289  |
| 19          | ENSG00000116350 | ENSG00000197245 | 3                | 0.00773195876289  |

Table S14: Sample coverage by combinations for STAD

| Combination | Gene1           | Gene2           | #Samples Covered | Fraction Coverage |
|-------------|-----------------|-----------------|------------------|-------------------|
| 1           | ENSG00000133056 | ENSG00000158445 | 209              | 0.659305993691    |
| 2           | ENSG00000141510 | ENSG00000149531 | 173              | 0.545741324921    |
| 3           | ENSG00000204501 | ENSG00000173213 | 128              | 0.403785488959    |
| 4           | ENSG00000141510 | ENSG00000065534 | 90               | 0.283911671924    |
| 5           | ENSG00000153820 | ENSG00000141510 | 72               | 0.227129337539    |
| 6           | ENSG00000155657 | ENSG00000133193 | 71               | 0.223974763407    |
| 7           | ENSG00000141298 | ENSG00000133112 | 45               | 0.141955835962    |
| 8           | ENSG00000080031 | ENSG00000077782 | 32               | 0.10094637224     |

Table S15: Sample coverage by combinations for OV

| Combination | Gene1           | Gene2           | #Samples Covered | Fraction Coverage |
|-------------|-----------------|-----------------|------------------|-------------------|
| 1           | ENSG00000184956 | ENSG00000173213 | 256              | 0.608076009501    |
| 2           | ENSG00000169862 | ENSG00000149531 | 185              | 0.439429928741    |
| 3           | ENSG00000163283 | ENSG00000149531 | 102              | 0.242280285036    |
| 4           | ENSG00000038358 | ENSG00000157764 | 92               | 0.218527315914    |
| 5           | ENSG00000157764 | ENSG00000100290 | 70               | 0.166270783848    |
| 6           | ENSG00000157764 | ENSG00000170369 | 68               | 0.161520190024    |
| 7           | ENSG00000157764 | ENSG00000186818 | 33               | 0.0783847980998   |
| 8           | ENSG00000104974 | ENSG00000213281 | 27               | 0.0641330166271   |
| 9           | ENSG00000175216 | ENSG00000211896 | 23               | 0.0546318289786   |
| 10          | ENSG00000204479 | ENSG00000205246 | 16               | 0.0380047505938   |
| 11          | ENSG00000118777 | ENSG00000100626 | 11               | 0.0261282660333   |
| 12          | ENSG00000113649 | ENSG00000186395 | 8                | 0.0190023752969   |
| 13          | ENSG00000137492 | ENSG00000155034 | 3                | 0.00712589073634  |

Table S16: Sample coverage by combinations for THCA

| Combination | Gene1           | Gene2           | #Samples Covered | Fraction Coverage |
|-------------|-----------------|-----------------|------------------|-------------------|
| 1           | ENSG00000184956 | ENSG00000173213 | 247              | 0.586698337292    |
| 2           | ENSG00000169862 | ENSG00000149531 | 203              | 0.482185273159    |
| 3           | ENSG00000163283 | ENSG00000149531 | 90               | 0.21377672209     |
| 4           | ENSG00000211896 | ENSG00000168096 | 37               | 0.0878859857482   |
| 5           | ENSG00000213516 | ENSG00000121067 | 31               | 0.0736342042755   |
| 6           | ENSG00000211896 | ENSG00000135341 | 26               | 0.061757719715    |
| 7           | ENSG00000100401 | ENSG00000008988 | 25               | 0.0593824228029   |
| 8           | ENSG00000154358 | ENSG00000112559 | 19               | 0.0451306413302   |
| 9           | ENSG00000187545 | ENSG00000227152 | 17               | 0.0403800475059   |
| 10          | ENSG00000196498 | ENSG00000159625 | 14               | 0.0332541567696   |
| 11          | ENSG00000204442 | ENSG00000221923 | 12               | 0.0285035629454   |
| 12          | ENSG00000196539 | ENSG00000205445 | 12               | 0.0285035629454   |
| 13          | ENSG00000198502 | ENSG00000197595 | 11               | 0.0261282660333   |
| 14          | ENSG00000177548 | ENSG00000180104 | 8                | 0.0190023752969   |
| 15          | ENSG00000152661 | ENSG00000043355 | 8                | 0.0190023752969   |
| 16          | ENSG00000196187 | ENSG00000152086 | 7                | 0.0166270783848   |
| 17          | ENSG00000198128 | ENSG00000162009 | 6                | 0.0142517814727   |
| 18          | ENSG00000134545 | ENSG00000185519 | 6                | 0.0142517814727   |
| 19          | ENSG00000116721 | ENSG00000142546 | 4                | 0.00950118764846  |
| 20          | ENSG00000143226 | ENSG00000099889 | 2                | 0.00475059382423  |

Table S17: Sample coverage by combinations for PRAD



| Combination | Gene1           | Gene2           | #Samples Covered | Fraction Coverage |
|-------------|-----------------|-----------------|------------------|-------------------|
| 1           | ENSG00000134982 | ENSG00000149531 | 281              | 0.72987012987     |
| 2           | ENSG00000184956 | ENSG00000173213 | 214              | 0.555844155844    |
| 3           | ENSG00000149531 | ENSG00000180329 | 158              | 0.41038961039     |
| 4           | ENSG00000120314 | ENSG00000157423 | 60               | 0.155844155844    |
| 5           | ENSG00000184634 | ENSG00000198786 | 42               | 0.109090909091    |
| 6           | ENSG00000176542 | ENSG00000100151 | 39               | 0.101298701299    |
| 7           | ENSG00000204130 | ENSG00000188766 | 24               | 0.0623376623377   |
| 8           | ENSG00000154330 | ENSG00000000971 | 20               | 0.0519480519481   |
| 9           | ENSG00000162620 | ENSG00000110074 | 10               | 0.025974025974    |

Table S18: Sample coverage by combinations for COAD

## A.5 Correlation between Genes within Combinations

We investigate whether the sample coverages of genes within a combination are correlated in normal samples to determine if we may be identifying passenger mutations as part of the combinations. Figure S1 shows  $-\log_{10} p$  against Pearson's correlation coefficients, where  $p$  is the p-value. We find no evidence of the genes within combinations being significantly correlated.

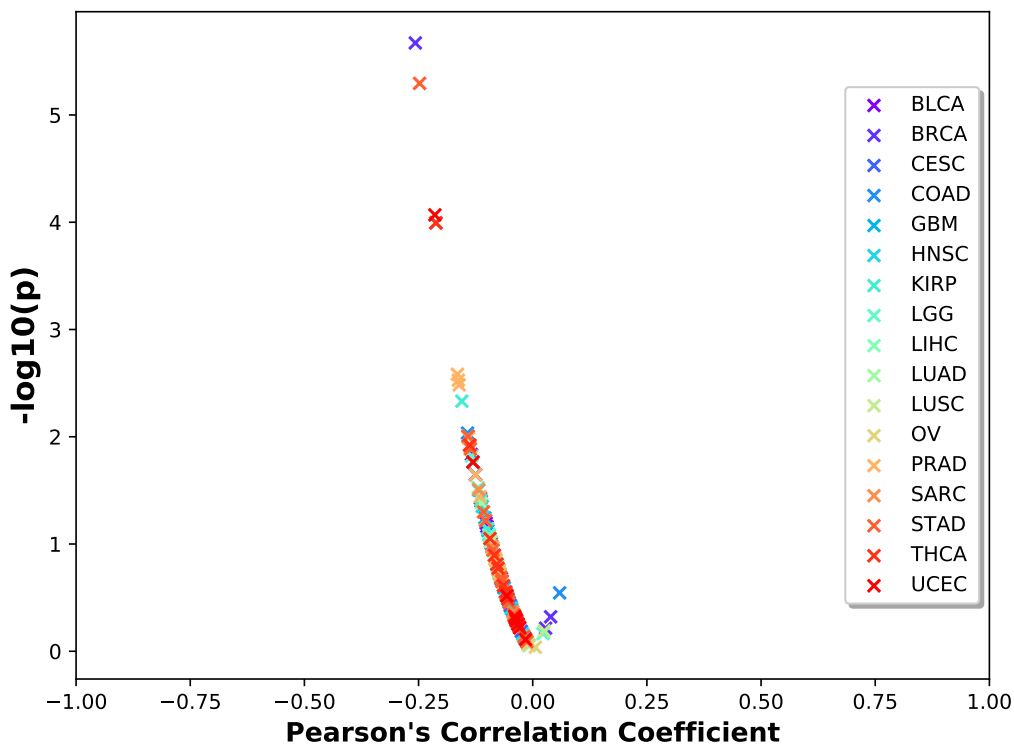

Figure S1:  $-\log_{10} p$  vs Pearson correlation coefficient plot for all pairs of genes in all combinations identified by our method using the normal samples, where  $p$  is the p-value. Since no pair has a p-value  $< 0.005$  (or  $-\log_{10} p \geq 2.301$ ) and absolute Pearson correlation coefficient greater than 0.50, none of the combinations appear to have correlated genes.

## A.6 Coverage of Samples by Identified Combinations

Figure S3 shows fractions of tumor samples covered by identified combinations. Most samples are covered by the top combinations, while a very small number of samples require a large number of combinations. Figure S4 shows that this distribution is similar for different ways of partitioning data.

Figure S5 shows that many samples can be covered by more than one combinations. These overlapping combinations might constitute more than two hits.

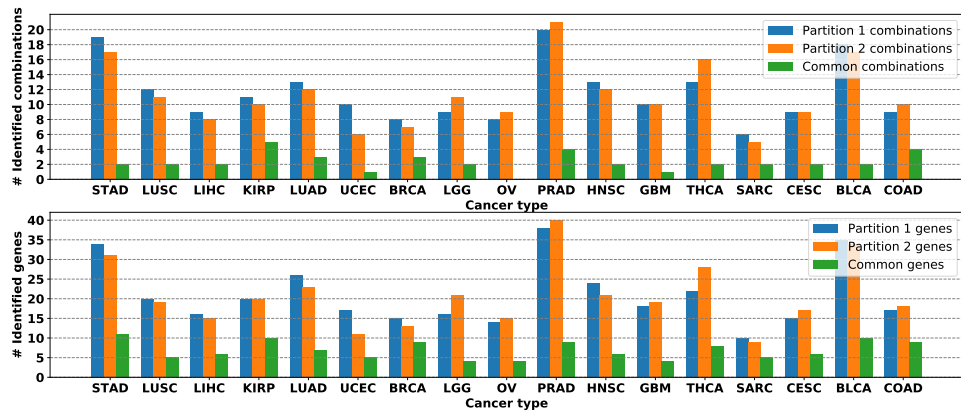

Figure S2: Identified genes and combinations shared between two sets of partitions. (1 – 5) combinations are shared between two sets and (4 – 10) genes are shared between two sets.

## A.7 Distinguishing between driver and passenger mutations

Recatome superpathways associated with the genes in the top three 2-hit combinations are shown in Tables S19-S22.

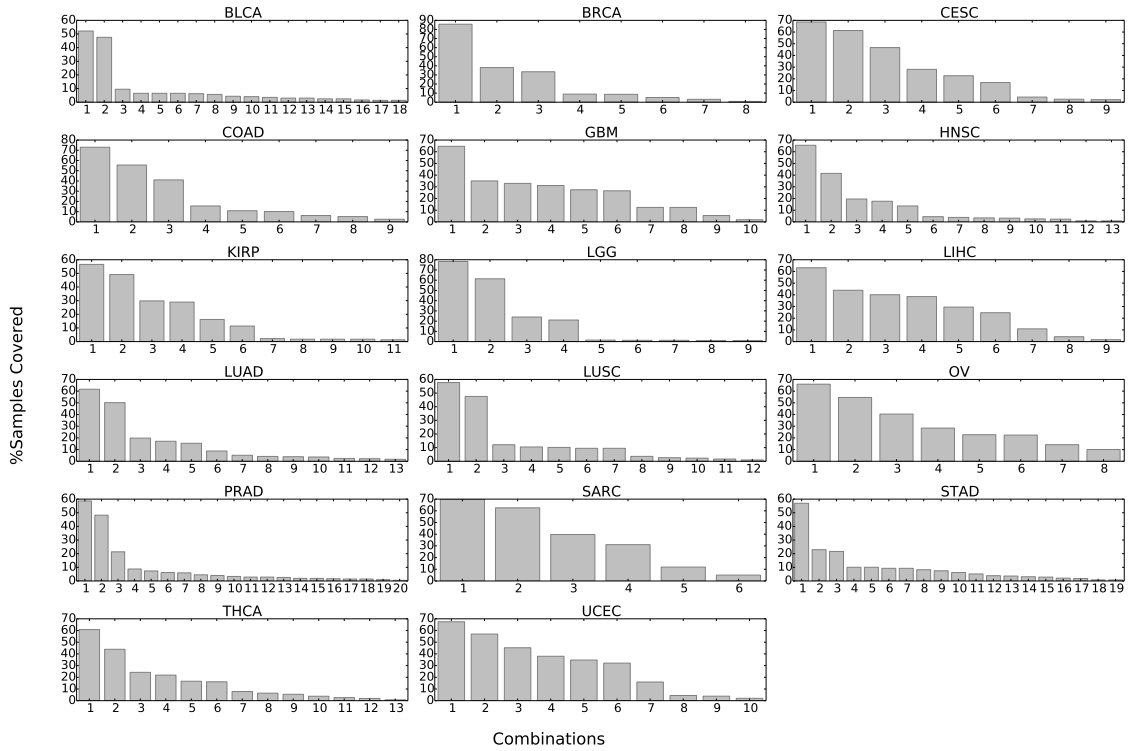

Figure S3: Occurrence of 2-hit combinations identified in tumor samples, for the seventeen cancer types considered. The top combination occurs in 65% of tumor samples, on average, while 42% of the combinations occur in less than 5% of the samples. Total percentage exceeds 100% because samples can contain multiple combinations.

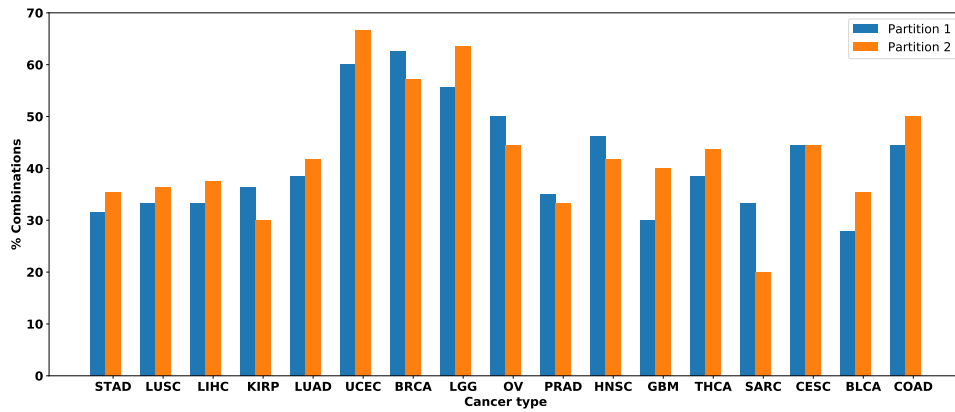

Figure S4: Percentage of identified combinations covering the last 5% of samples for the 17 cancer types. On average last 42% of the combinations occur in 5% of the tumor samples.

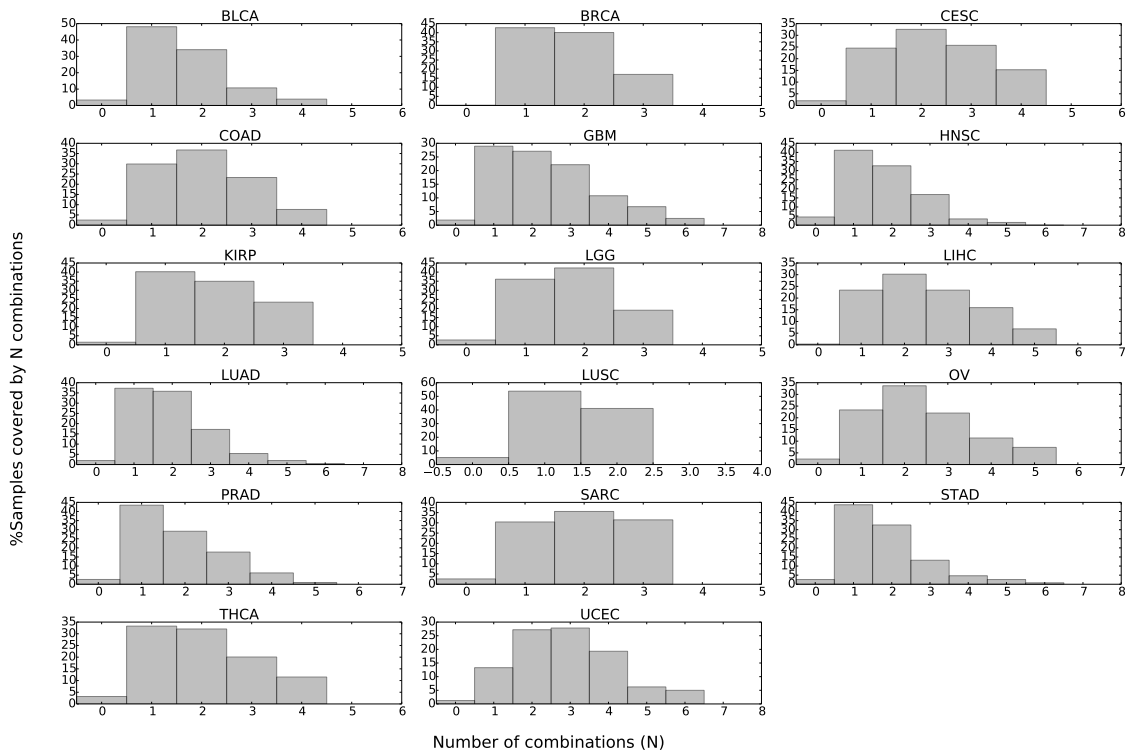

Figure S5: Distribution of overlapping combinations for seventeen cancer types. 64.5% of tumor samples contain multiple combinations, suggesting that the 2-hit combinations represent subsets of three or more hits.

| Cancer | Gene      | Reactome Superpathways |            |               |                 |                        |                       |         |                            |            |             |                             |                                      |                  |            |                                   |                        |                    |                       |                         |                 |                 |              |           |                                            |  |
|--------|-----------|------------------------|------------|---------------|-----------------|------------------------|-----------------------|---------|----------------------------|------------|-------------|-----------------------------|--------------------------------------|------------------|------------|-----------------------------------|------------------------|--------------------|-----------------------|-------------------------|-----------------|-----------------|--------------|-----------|--------------------------------------------|--|
|        |           | Signal Transduction    | Metabolism | Immune System | Gene Expression | Metabolism of proteins | Developmental Biology | Disease | Vesicle-mediated transport | Cell Cycle | Homeostasis | Cellular response to stress | Organelle biogenesis and maintenance | Neuronal Systems | DNA Repair | Extracellular matrix organization | Chromatin organization | Muscle contraction | Programmed Cell Death | Cell-Cell communication | DNA Replication | Circadian Clock | Reproduction | Mitophagy | Transmembrane transport of small molecules |  |
| BLCA   | MUC6      |                        |            |               |                 | X                      |                       |         |                            |            |             |                             |                                      |                  |            |                                   |                        |                    |                       |                         |                 |                 |              |           |                                            |  |
|        | TUBB8P12  |                        |            |               |                 |                        | X                     |         |                            |            |             |                             |                                      |                  |            |                                   |                        |                    |                       |                         |                 |                 |              |           |                                            |  |
|        | CTNND2    |                        |            |               |                 |                        |                       |         |                            |            |             |                             |                                      |                  |            |                                   |                        |                    |                       |                         |                 |                 |              |           |                                            |  |
|        | FRG1BP    |                        |            |               |                 |                        |                       |         |                            |            |             |                             |                                      |                  |            |                                   |                        |                    |                       |                         |                 |                 |              |           |                                            |  |
|        | CCDC30    |                        |            |               |                 |                        |                       |         |                            |            |             |                             |                                      |                  |            |                                   |                        |                    |                       |                         |                 |                 |              |           |                                            |  |
|        | RB1       |                        |            |               |                 |                        |                       |         |                            |            | X           |                             | X                                    |                  |            |                                   |                        |                    |                       |                         |                 |                 | X            |           |                                            |  |
| BRCA   | MUC12     |                        |            |               |                 | X                      |                       | X       |                            |            |             |                             |                                      |                  |            |                                   |                        |                    |                       |                         |                 |                 |              |           |                                            |  |
|        | MUC6      |                        |            |               |                 | X                      |                       | X       |                            |            |             |                             |                                      |                  |            |                                   |                        |                    |                       |                         |                 |                 |              |           |                                            |  |
|        | FRG1BP    |                        |            |               |                 |                        |                       |         |                            |            |             |                             |                                      |                  |            |                                   |                        |                    |                       |                         |                 |                 |              |           |                                            |  |
|        | IGHG1     |                        |            | X             |                 |                        |                       |         |                            |            |             |                             |                                      |                  |            |                                   |                        |                    |                       |                         |                 |                 |              |           |                                            |  |
|        | AHNAK2    |                        |            |               |                 |                        |                       |         |                            |            |             |                             |                                      |                  |            |                                   |                        |                    |                       |                         |                 |                 |              |           |                                            |  |
|        | FETUB     |                        |            |               |                 |                        |                       |         |                            |            |             |                             |                                      |                  |            |                                   |                        |                    |                       |                         |                 |                 |              |           |                                            |  |
| CESC   | MUC6      |                        |            |               |                 | X                      |                       | X       |                            |            |             |                             |                                      |                  |            |                                   |                        |                    |                       |                         |                 |                 |              |           |                                            |  |
|        | TUBB8P12  |                        |            |               |                 |                        |                       |         |                            |            |             |                             |                                      |                  |            |                                   |                        |                    |                       |                         |                 |                 |              |           |                                            |  |
|        | MUC12     |                        |            |               |                 | X                      |                       | X       |                            |            |             |                             |                                      |                  |            |                                   |                        |                    |                       |                         |                 |                 |              |           |                                            |  |
|        | GOLGA6L10 |                        |            |               |                 |                        |                       |         |                            |            |             |                             |                                      |                  |            |                                   |                        |                    |                       |                         |                 |                 |              |           |                                            |  |
|        | FRG1BP    |                        |            |               |                 | X                      |                       | X       |                            |            |             |                             |                                      |                  |            |                                   |                        |                    |                       |                         |                 |                 |              |           |                                            |  |
| COAD   | APC       | X                      |            |               |                 | X                      |                       | X       |                            |            |             |                             |                                      |                  |            |                                   |                        |                    |                       |                         | X               |                 |              |           |                                            |  |
|        | FRG1BP    |                        |            |               |                 |                        |                       |         |                            |            |             |                             |                                      |                  |            |                                   |                        |                    |                       |                         |                 |                 |              |           |                                            |  |
|        | MUC6      |                        |            |               |                 | X                      |                       | X       |                            |            |             |                             |                                      |                  |            |                                   |                        |                    |                       |                         |                 |                 |              |           |                                            |  |
|        | TUBB8P12  |                        |            |               |                 |                        |                       |         |                            |            |             |                             |                                      |                  |            |                                   |                        |                    |                       |                         |                 |                 |              |           |                                            |  |
|        | FRG1BP    |                        |            |               |                 |                        |                       |         |                            |            |             |                             |                                      |                  |            |                                   |                        |                    |                       |                         |                 |                 |              |           |                                            |  |
|        | CCDC43    |                        |            |               |                 |                        |                       |         |                            |            |             |                             |                                      |                  |            |                                   |                        |                    |                       |                         |                 |                 |              |           |                                            |  |

Table S19: Reactome superpathways associated with genes in the top three 2-hit combinations for BLCA, BRCA, CESC and COAD.[Fabregat et. al., Nucleic Acids Research, 44(D1):D481-D487, 2016] For each cancer type, the first two genes represent the first combination, the second two genes the second combination and the third two genes the third combination.

| Cancer | Gene     | Reactome Superpathways |            |               |                 |                        |                       |         |                            |            |             |                             |                                      |                  |            |                                   |                        |                    |                       |                         |                 |                 |              |           |                                            |  |
|--------|----------|------------------------|------------|---------------|-----------------|------------------------|-----------------------|---------|----------------------------|------------|-------------|-----------------------------|--------------------------------------|------------------|------------|-----------------------------------|------------------------|--------------------|-----------------------|-------------------------|-----------------|-----------------|--------------|-----------|--------------------------------------------|--|
|        |          | Signal Transduction    | Metabolism | Immune System | Gene Expression | Metabolism of proteins | Developmental Biology | Disease | Vesicle-mediated transport | Cell Cycle | Homeostasis | Cellular response to stress | Organelle biogenesis and maintenance | Neuronal Systems | DNA Repair | Extracellular matrix organization | Chromatin organization | Muscle contraction | Programmed Cell Death | Cell-Cell communication | DNA Replication | Circadian Clock | Reproduction | Mitophagy | Transmembrane transport of small molecules |  |
| GBM    | OR8U1    | X                      |            |               |                 |                        |                       |         |                            |            |             |                             |                                      |                  |            |                                   |                        |                    |                       |                         |                 |                 |              |           |                                            |  |
|        | TUBB8P12 |                        |            |               |                 |                        |                       |         |                            |            |             |                             |                                      |                  |            |                                   |                        |                    |                       |                         |                 |                 |              |           |                                            |  |
|        | FRG1BP   |                        |            |               |                 |                        |                       |         |                            |            |             |                             |                                      |                  |            |                                   |                        |                    |                       |                         |                 |                 |              |           |                                            |  |
|        | ALOX15   |                        | X          |               |                 |                        |                       |         |                            |            |             |                             |                                      |                  |            |                                   |                        |                    |                       |                         |                 |                 |              |           |                                            |  |
|        | UBR4     |                        |            | X             |                 |                        |                       |         |                            |            |             |                             |                                      |                  |            |                                   |                        |                    |                       |                         |                 |                 |              |           |                                            |  |
| HNSC   | KCNB1    | X                      |            |               |                 |                        |                       |         |                            |            |             |                             | X                                    |                  |            |                                   |                        |                    |                       |                         |                 |                 |              |           |                                            |  |
|        | MUC6     |                        |            |               | X               | X                      |                       |         |                            |            |             |                             |                                      |                  |            |                                   |                        |                    |                       |                         |                 |                 |              |           |                                            |  |
|        | TUBB8P12 |                        |            |               |                 |                        |                       |         |                            |            |             |                             |                                      |                  |            |                                   |                        |                    |                       |                         |                 |                 |              |           |                                            |  |
|        | TP53     | X                      | X          | X             | X               |                        |                       |         | X                          | X          | X           |                             |                                      | X                |            |                                   |                        |                    |                       | X                       |                 |                 |              |           |                                            |  |
|        | IGHG1    |                        |            | X             |                 |                        |                       |         |                            |            |             |                             |                                      |                  |            |                                   |                        |                    |                       |                         |                 |                 |              |           |                                            |  |
|        | FRG1BP   |                        |            |               |                 |                        |                       |         |                            |            |             |                             |                                      |                  |            |                                   |                        |                    |                       |                         |                 |                 |              |           |                                            |  |
| KIRP   | HLA-C    |                        |            | X             |                 |                        |                       |         |                            |            |             |                             |                                      |                  |            |                                   |                        |                    |                       |                         |                 |                 |              |           |                                            |  |
|        | MUC6     |                        |            |               | X               | X                      |                       |         |                            |            |             |                             |                                      |                  |            |                                   |                        |                    |                       |                         |                 |                 |              |           |                                            |  |
|        | TUBB8P12 |                        |            |               |                 |                        |                       |         |                            |            |             |                             |                                      |                  |            |                                   |                        |                    |                       |                         |                 |                 |              |           |                                            |  |
|        | FHOD3    |                        |            |               |                 |                        |                       |         |                            |            |             |                             |                                      |                  |            |                                   |                        |                    |                       |                         |                 |                 |              |           |                                            |  |
|        | FRG1BP   |                        |            |               |                 |                        |                       |         |                            |            |             |                             |                                      |                  |            |                                   |                        |                    |                       |                         |                 |                 |              |           |                                            |  |
|        | HRNR     |                        |            | X             |                 |                        |                       |         |                            |            |             |                             |                                      |                  |            |                                   |                        |                    |                       |                         |                 |                 |              |           |                                            |  |
| LGG    | OR2T7    |                        |            |               |                 |                        |                       |         |                            |            |             |                             |                                      |                  |            |                                   |                        |                    |                       |                         |                 |                 |              |           |                                            |  |
|        | IDH1     | X                      | X          |               |                 |                        |                       |         |                            |            |             |                             |                                      |                  |            |                                   |                        |                    |                       |                         |                 |                 |              |           |                                            |  |
|        | MUC6     |                        |            |               | X               | X                      |                       |         |                            |            |             |                             |                                      |                  |            |                                   |                        |                    |                       |                         |                 |                 |              |           |                                            |  |
|        | MUC6     |                        |            |               | X               | X                      |                       |         |                            |            |             |                             |                                      |                  |            |                                   |                        |                    |                       |                         |                 |                 |              |           |                                            |  |
|        | TUBB8P12 |                        |            |               |                 |                        |                       |         |                            |            |             |                             |                                      |                  |            |                                   |                        |                    |                       |                         |                 |                 |              |           |                                            |  |
|        | R3HDM2   |                        |            |               |                 |                        |                       |         |                            |            |             |                             |                                      |                  |            |                                   |                        |                    |                       |                         |                 |                 |              |           |                                            |  |
| FRG1BP |          |                        |            |               |                 |                        |                       |         |                            |            |             |                             |                                      |                  |            |                                   |                        |                    |                       |                         |                 |                 |              |           |                                            |  |

Table S20: Reactome superpathways associated with genes in the top three 2-hit combinations for GBM, HNSC, KIRP, and LGG.[Fabregat et. al., Nucleic Acids Research, 44(D1):D481-D487, 2016] For each cancer type, the first two genes represent the first combination, the second two genes the second combination and the third two genes the third combination.

| Cancer | Gene     | Reactome Superpathways |            |               |                 |                        |                       |         |                            |            |             |                             |                                      |                  |            |                                   |                        |                    |                       |                         |                 |                 |              |           |                                            |
|--------|----------|------------------------|------------|---------------|-----------------|------------------------|-----------------------|---------|----------------------------|------------|-------------|-----------------------------|--------------------------------------|------------------|------------|-----------------------------------|------------------------|--------------------|-----------------------|-------------------------|-----------------|-----------------|--------------|-----------|--------------------------------------------|
|        |          | Signal Transduction    | Metabolism | Immune System | Gene Expression | Metabolism of proteins | Developmental Biology | Disease | Vesicle-mediated transport | Cell Cycle | Homeostasis | Cellular response to stress | Organelle biogenesis and maintenance | Neuronal Systems | DNA Repair | Extracellular matrix organization | Chromatin organization | Muscle contraction | Programmed Cell Death | Cell-Cell communication | DNA Replication | Circadian Clock | Reproduction | Mitophagy | Transmembrane transport of small molecules |
| LHC    | FRG1BP   |                        |            |               |                 |                        |                       |         |                            |            |             |                             |                                      |                  |            |                                   |                        |                    |                       |                         |                 |                 |              |           |                                            |
|        | FHOD3    |                        |            |               |                 |                        |                       |         |                            |            |             |                             |                                      |                  |            |                                   |                        |                    |                       |                         |                 |                 |              |           |                                            |
|        | OR2T7    |                        |            |               |                 |                        |                       |         |                            |            |             |                             |                                      |                  |            |                                   |                        |                    |                       |                         |                 |                 |              |           |                                            |
|        | MUC6     |                        |            |               |                 | X                      | X                     |         |                            |            |             |                             |                                      |                  |            |                                   |                        |                    |                       |                         |                 |                 |              |           |                                            |
|        | OR2T33   | X                      |            |               |                 |                        |                       |         |                            |            |             |                             |                                      |                  |            |                                   |                        |                    |                       |                         |                 |                 |              |           |                                            |
|        | TUBB8P12 |                        |            |               |                 |                        |                       |         |                            |            |             |                             |                                      |                  |            |                                   |                        |                    |                       |                         |                 |                 |              |           |                                            |
| LUAD   | MUC6     |                        |            |               |                 | X                      | X                     |         |                            |            |             |                             |                                      |                  |            |                                   |                        |                    |                       |                         |                 |                 |              |           |                                            |
|        | TUBB8P12 |                        |            |               |                 |                        |                       |         |                            |            |             |                             |                                      |                  |            |                                   |                        |                    |                       |                         |                 |                 |              |           |                                            |
|        | CTNND2   |                        |            |               |                 |                        |                       |         |                            |            |             |                             |                                      |                  |            |                                   |                        |                    |                       |                         |                 |                 |              |           |                                            |
|        | FRG1BP   |                        |            |               |                 |                        |                       |         |                            |            |             |                             |                                      |                  |            |                                   |                        |                    |                       |                         |                 |                 |              |           |                                            |
|        | OR2T7    |                        |            |               |                 |                        |                       |         |                            |            |             |                             |                                      |                  |            |                                   |                        |                    |                       |                         |                 |                 |              |           |                                            |
|        | PRSS3    | X                      | X          |               |                 |                        |                       |         |                            |            |             |                             |                                      |                  |            |                                   |                        |                    |                       |                         |                 |                 |              |           |                                            |
| LUSC   | MUC6     |                        |            |               |                 | X                      | X                     |         |                            |            |             |                             |                                      |                  |            |                                   |                        |                    |                       |                         |                 |                 |              |           |                                            |
|        | TUBB8P12 |                        |            |               |                 |                        |                       |         |                            |            |             |                             |                                      |                  |            |                                   |                        |                    |                       |                         |                 |                 |              |           |                                            |
|        | TP53     | X                      | X          | X             | X               |                        |                       |         | X                          | X          | X           |                             |                                      | X                |            |                                   |                        |                    |                       | X                       |                 |                 |              |           |                                            |
|        | FRG1BP   |                        |            |               |                 |                        |                       |         |                            |            |             |                             |                                      |                  |            |                                   |                        |                    |                       |                         |                 |                 |              |           |                                            |
|        | TP53     | X                      | X          | X             | X               |                        |                       |         | X                          | X          | X           |                             |                                      | X                |            |                                   |                        |                    |                       | X                       |                 |                 |              |           |                                            |
|        | DPP6     |                        |            |               |                 |                        |                       |         |                            |            |             |                             |                                      |                  |            |                                   |                        |                    |                       |                         |                 |                 |              |           |                                            |
| OV     | PIK3C2B  |                        | X          |               |                 |                        |                       |         |                            |            |             |                             |                                      |                  |            |                                   |                        |                    |                       |                         |                 |                 |              |           |                                            |
|        | KCNB1    |                        | X          |               |                 |                        |                       |         |                            |            |             |                             | X                                    |                  |            |                                   |                        |                    |                       |                         |                 |                 |              |           |                                            |
|        | TP53     | X                      | X          | X             | X               |                        |                       |         | X                          | X          | X           |                             |                                      | X                |            |                                   |                        |                    |                       | X                       |                 |                 |              |           |                                            |
|        | FRG1BP   |                        |            |               |                 |                        |                       |         |                            |            |             |                             |                                      |                  |            |                                   |                        |                    |                       |                         |                 |                 |              |           |                                            |
|        | TP53     | X                      | X          | X             | X               |                        |                       |         | X                          | X          | X           |                             |                                      | X                |            |                                   |                        |                    |                       | X                       |                 |                 |              |           |                                            |
|        | MYLK     | X                      |            |               |                 |                        |                       |         |                            |            |             |                             |                                      |                  |            |                                   |                        | X                  |                       |                         |                 |                 |              |           |                                            |

Table S21: Reactome superpathways associated with genes in the top three 2-hit combinations for LIHC, LUAD, LUSC and OV.[Fabregat et. al., Nucleic Acids Research, 44(D1):D481-D487, 2016] For each cancer type, the first two genes represent the first combination, the second two genes the second combination and the third two genes the third combination.



| Cancer | Gene     | Reactome Superpathways |            |               |                 |                        |                       |         |                            |            |             |                             |                                      |                  |            |                                   |                        |                    |                       |                         |                 |                 |              |           |                                            |  |
|--------|----------|------------------------|------------|---------------|-----------------|------------------------|-----------------------|---------|----------------------------|------------|-------------|-----------------------------|--------------------------------------|------------------|------------|-----------------------------------|------------------------|--------------------|-----------------------|-------------------------|-----------------|-----------------|--------------|-----------|--------------------------------------------|--|
|        |          | Signal Transduction    | Metabolism | Immune System | Gene Expression | Metabolism of proteins | Developmental Biology | Disease | Vesicle-mediated transport | Cell Cycle | Homeostasis | Cellular response to stress | Organelle biogenesis and maintenance | Neuronal Systems | DNA Repair | Extracellular matrix organization | Chromatin organization | Muscle contraction | Programmed Cell Death | Cell-Cell communication | DNA Replication | Circadian Clock | Reproduction | Mitophagy | Transmembrane transport of small molecules |  |
| PRAD   | MUC6     |                        |            |               |                 | X                      |                       | X       |                            |            |             |                             |                                      |                  |            |                                   |                        |                    |                       |                         |                 |                 |              |           |                                            |  |
|        | TUBB8P12 |                        |            |               |                 |                        |                       |         |                            |            |             |                             |                                      |                  |            |                                   |                        |                    |                       |                         |                 |                 |              |           |                                            |  |
|        | CTNND2   |                        |            |               |                 |                        |                       |         |                            |            |             |                             |                                      |                  |            |                                   |                        |                    |                       |                         |                 |                 |              |           |                                            |  |
|        | FRG1BP   |                        |            |               |                 |                        |                       |         |                            |            |             |                             |                                      |                  |            |                                   |                        |                    |                       |                         |                 |                 |              |           |                                            |  |
|        | RBMXL1   |                        |            |               |                 |                        |                       |         |                            |            |             |                             |                                      |                  |            |                                   |                        |                    |                       |                         |                 |                 |              |           |                                            |  |
|        | SPOP     | X                      |            |               |                 |                        |                       |         |                            |            |             |                             |                                      |                  |            |                                   |                        |                    |                       |                         |                 |                 |              |           |                                            |  |
| SARC   | MUC12    |                        |            |               |                 | X                      |                       | X       |                            |            |             |                             |                                      |                  |            |                                   |                        |                    |                       |                         |                 |                 |              |           |                                            |  |
|        | FRG1BP   |                        |            |               |                 |                        |                       |         |                            |            |             |                             |                                      |                  |            |                                   |                        |                    |                       |                         |                 |                 |              |           |                                            |  |
|        | MUC6     |                        |            |               |                 | X                      |                       | X       |                            |            |             |                             |                                      |                  |            |                                   |                        |                    |                       |                         |                 |                 |              |           |                                            |  |
|        | TUBB8P12 |                        |            |               |                 |                        |                       |         |                            |            |             |                             |                                      |                  |            |                                   |                        |                    |                       |                         |                 |                 |              |           |                                            |  |
|        | MUC12    |                        |            |               |                 | X                      |                       | X       |                            |            |             |                             |                                      |                  |            |                                   |                        |                    |                       |                         |                 |                 |              |           |                                            |  |
|        | GOLGA6L9 |                        |            |               |                 |                        |                       |         |                            |            |             |                             |                                      |                  |            |                                   |                        |                    |                       |                         |                 |                 |              |           |                                            |  |
| STAD   | MUC6     |                        |            |               |                 | X                      |                       | X       |                            |            |             |                             |                                      |                  |            |                                   |                        |                    |                       |                         |                 |                 |              |           |                                            |  |
|        | TUBB8P12 |                        |            |               |                 |                        |                       |         |                            |            |             |                             |                                      |                  |            |                                   |                        |                    |                       |                         |                 |                 |              |           |                                            |  |
|        | ALPP     |                        |            |               |                 |                        |                       |         |                            |            |             |                             |                                      |                  |            |                                   |                        |                    |                       |                         |                 |                 |              |           |                                            |  |
|        | FRG1BP   |                        |            |               |                 |                        |                       |         |                            |            |             |                             |                                      |                  |            |                                   |                        |                    |                       |                         |                 |                 |              |           |                                            |  |
|        | ATG2A    |                        |            |               |                 |                        |                       |         |                            |            |             |                             |                                      |                  |            |                                   |                        |                    |                       |                         |                 |                 |              |           |                                            |  |
|        | OR10H3   | X                      |            |               |                 |                        |                       |         |                            |            |             |                             |                                      |                  |            |                                   |                        |                    |                       |                         |                 |                 |              |           |                                            |  |
| THCA   | MUC6     |                        |            |               |                 | X                      |                       | X       |                            |            |             |                             |                                      |                  |            |                                   |                        |                    |                       |                         |                 |                 |              |           |                                            |  |
|        | TUBB8P12 |                        |            |               |                 |                        |                       |         |                            |            |             |                             |                                      |                  |            |                                   |                        |                    |                       |                         |                 |                 |              |           |                                            |  |
|        | CTNND2   |                        |            |               |                 |                        |                       |         |                            |            |             |                             |                                      |                  |            |                                   |                        |                    |                       |                         |                 |                 |              |           |                                            |  |
|        | FRG1BP   |                        |            |               |                 |                        |                       |         |                            |            |             |                             |                                      |                  |            |                                   |                        |                    |                       |                         |                 |                 |              |           |                                            |  |
|        | EDC4     |                        |            |               |                 | X                      |                       |         |                            |            |             |                             |                                      |                  |            |                                   |                        |                    |                       |                         |                 |                 |              |           |                                            |  |
|        | BRAF     | X                      |            | X             |                 |                        |                       |         | X                          | X          |             |                             |                                      |                  | X          |                                   |                        |                    |                       |                         |                 |                 |              |           |                                            |  |
| UCEC   | MUC12    |                        |            |               |                 | X                      |                       | X       |                            |            |             |                             |                                      |                  |            |                                   |                        |                    |                       |                         |                 |                 |              |           |                                            |  |
|        | FRG1BP   |                        |            |               |                 |                        |                       |         |                            |            |             |                             |                                      |                  |            |                                   |                        |                    |                       |                         |                 |                 |              |           |                                            |  |
|        | MUC6     |                        |            |               |                 | X                      |                       | X       |                            |            |             |                             |                                      |                  |            |                                   |                        |                    |                       |                         |                 |                 |              |           |                                            |  |
|        | TUBB8P12 |                        |            |               |                 |                        |                       |         |                            |            |             |                             |                                      |                  |            |                                   |                        |                    |                       |                         |                 |                 |              |           |                                            |  |
|        | HLA-DRB1 |                        |            |               |                 | X                      |                       |         |                            |            |             |                             |                                      |                  |            |                                   |                        |                    |                       |                         |                 |                 |              |           |                                            |  |
|        | PTEN     | X                      | X          | X             | X               | X                      |                       | X       |                            |            |             |                             |                                      |                  |            |                                   |                        |                    |                       |                         |                 |                 |              |           |                                            |  |

Table S22: Reactome superpathways associated with genes in the top three 2-hit combinations for PRAD, SARC, STAD, THCA and UCEC.[Fabregat et. al., Nucleic Acids Research, 44(D1):D481-D487, 2016] For each cancer type, the first two genes represent the first combination, the second two genes the second combination and the third two genes the third combination.
